# Supplementary material
Source: HighWire-hosted journal article supplement (https://www.cmajopen.ca/highwire/filestream/87301/field_highwire_adjunct_files/3/2021-0013-4-at.pdf)

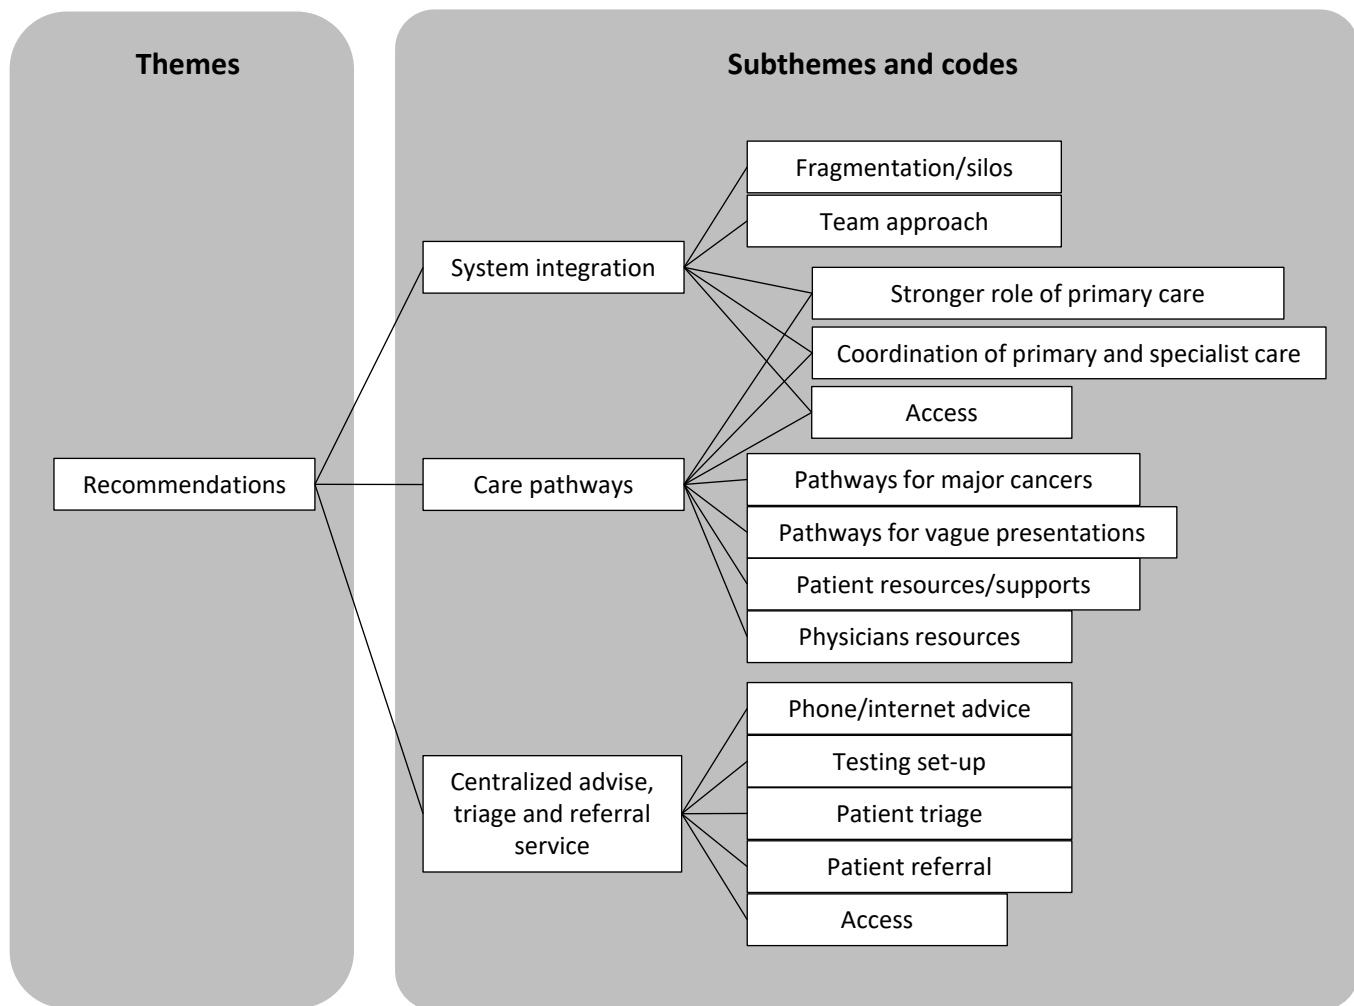

Supplement: 2021-0013-4-at.pdf [file 2021-0013-4-at.pdf]
